# Supplementary material for: Donnan Dialysis for Recovering Ammonium from Fermentation Solutions Rich in Volatile Fatty Acids
Source: MDPI journal article supplement (doi:10.3390/membranes13030347), 2023-03-17
Supplement: s1 [file s1]

# Donnan Dialysis for Recovering Ammonium from Fermentation Solutions Rich in Volatile Fatty Acids

This supplementary material presents:

- (1) Equations S1–S5, which were used to calculate the theoretical and real/final mass balances of ammonium ions.
- (2) Tables S1, S3–S8, which contain the results of theoretical and real/final mass balance of ammonium ions present in the feed and receiver solutions after each Donnan dialysis experiment.
- (3) Table S2, which presents the results of the evaluation of ammonium sorption occurrence in Fumasep, Ralex and Ionsep membranes.
- (4) Table S9, which contains the molar concentration (mmol/L) of trace/other cationic and anionic species present in the initial and final real feed and receiver solutions.
- (5) Section S1 and Figure S1, which present the results of membrane characterization by means of ATR-FTIR.
- (6) Figure S2, which shows the speciation diagram for ammonia/ammonium ions.

## Equations S1 – S5: Calculation of the theoretical and real/final mass balances of ammonium ions

Equations S1 – S3 were used to calculate the theoretical mass balance of ammonium ions at different operating times ( $i$ ), whereas Equations S2, S4 and S5 were used to calculate the real/final mass balance. In the equations, the subscripts  $F$  and  $R$  represent feed and receiver solutions, respectively, and the subscripts  $0$ ,  $i$  and  $f$  represent initial state, time  $i$  and final time (end of experiment), respectively.

$$\text{Theoretical mass balance}_i = 100 + \left( \frac{\text{Theoretical } NH_4^+ \text{ mass}_{(F+R+\text{aliquots})_i} - NH_4^+ \text{ mass}_{(F+R)_0}}{NH_4^+ \text{ mass}_{(F+R)_0}} \right) \quad (\text{S1})$$

$$NH_4^+ \text{ mass}_{(F+R)_0} = C_{F_0} V_{F_0} + C_{R_0} V_{R_0} \quad (\text{S2})$$

$$\text{Theoretical } NH_4^+ \text{ mass}_{(F+R+\text{aliquots})_i} = (C_{F_i} \times \text{theoretical } V_{F_i}) \quad (\text{S3})$$

$$+ (C_{R_i} \times \text{theoretical } V_{R_i}) + \sum_{i=0}^i [C_{(\text{aliquots of } F)_i} \times V_{(\text{aliquots of } F)_i}]$$

$$+ \sum_{i=0}^i [C_{(\text{aliquots of } R)_i} \times V_{(\text{aliquots of } R)_i}]$$

$$\text{Real/final mass balance} = 100 + \left( \frac{\text{Real/final } NH_4^+ \text{ mass}_{(F+R+\text{aliquots})_f} - NH_4^+ \text{ mass}_{(F+R)_0}}{NH_4^+ \text{ mass}_{(F+R)_0}} \right) \quad (\text{S4})$$

$$Real/final NH_4^+ mass_{(F+R+aliquots)_f} = (C_{F_f} \times real V_{F_f}) + (C_{R_f} \times real V_{R_f}) + \sum_{i=0}^f [C_{(aliquots\ of\ F)_i} \times V_{(aliquots\ of\ F)_i}] + \sum_{i=0}^f [C_{(aliquots\ of\ R)_i} \times V_{(aliquots\ of\ R)_i}] \quad (S5)$$

**Table S1.** Theoretical and real mass balance (%) of ammonium ions present in the synthetic feed and receiver solutions of the experiments conducted with Fumasep, Ralex, and Ionsep membranes (Figure 1).

| Aliquot                     | Theoretical Mass Balance (%) |       |        |
|-----------------------------|------------------------------|-------|--------|
|                             | Fumasep                      | Ralex | Ionsep |
| 1                           | 100                          | 100   | 100    |
| 2                           | 96                           | 93    | 89     |
| 3                           | 94                           | 93    | 83     |
| 4                           | 98                           | 94    | 86     |
| 5                           | 99                           | 58    | 79     |
| 6                           | 99                           | 84    | 82     |
| 7                           | 99                           | 83    | 80     |
| 8                           | 100                          | 85    | 79     |
| 9                           | 98                           | 84    | 78     |
| 10                          | 98                           | 84    | 80     |
| 11                          | 97                           | 84    | 79     |
| 12                          | 96                           | 86    | 81     |
| 13                          | 96                           |       | 81     |
| 14                          | 97                           |       |        |
| Real/final mass balance (%) |                              |       |        |
|                             | 100                          | 86    | 84     |

**Table S2.** Ammonium concentration values in the synthetic feed and NaCl/HCl solutions obtained in the evaluation of ammonium sorption occurrence in Fumasep, Ralex and Ionsep membranes.

| Test conducted with NaCl                                     |         |       |        |
|--------------------------------------------------------------|---------|-------|--------|
|                                                              | Fumasep | Ralex | Ionsep |
| Ammonium concentration in the initial feed solution (mmol/L) |         | 24.7  |        |
| Ammonium concentration in the final feed solution (mmol/L)   | 24.7    | 19.4  | 18.4   |
| Ammonium sorbed per dry membrane mass (mmol/g)               | 0       | 1.3   | 1.2    |
| Ammonium concentration in the final NaCl solution (mmol/L)   | 0.9     | 4.4   | 4.4    |
| Final mass balance (%)                                       | 103.5   | 96.1  | 92.0   |
| Test conducted with HCl                                      |         |       |        |
|                                                              | Fumasep | Ralex | Ionsep |
| Ammonium concentration in the initial feed solution (mmol/L) |         | 24.7  |        |
| Ammonium concentration in the final feed solution (mmol/L)   | 25.6    | 19.7  | 19.6   |
| Ammonium sorbed per dry membrane mass (mmol/g)               | 0       | 1.2   | 1.2    |
| Ammonium concentration in the final NaCl solution (mmol/L)   | 0.8     | 4.5   | 4.5    |
| Final mass balance (%)                                       | 103.6   | 97.7  | 97.1   |

**Table S3.** Theoretical and real mass balance (%) of ammonium ions present in the synthetic feed and receiver solutions of the experiments conducted HCl and NaCl as receiver solution (Figure 2).

| Aliquot                     | Theoretical mass balance (%) |      |
|-----------------------------|------------------------------|------|
|                             | HCl                          | NaCl |
| 1                           | 100                          | 100  |
| 2                           | 92                           | 93   |
| 3                           | 89                           | 93   |
| 4                           | 95                           | 94   |
| 5                           | 91                           | 58   |
| 6                           | 89                           | 84   |
| 7                           | 95                           | 83   |
| 8                           | 93                           | 85   |
| 9                           | 93                           | 84   |
| 10                          | 93                           | 84   |
| 11                          | 95                           | 84   |
| 12                          | 93                           | 86   |
| 13                          | 96                           |      |
| Real/final mass balance (%) |                              |      |
|                             | 97                           | 86   |

**Table S4.** Theoretical and real mass balance (%) of ammonium ions present in the synthetic feed and receiver solutions of the experiments conducted using flow rate of 110, 220, 330, and 440 ml/min (Figure 3).

| Aliquot                     | Theoretical mass balance (%) |            |            |            |
|-----------------------------|------------------------------|------------|------------|------------|
|                             | 110 mL/min                   | 220 mL/min | 330 mL/min | 440 mL/min |
| 1                           | 100                          | 100        | 100        | 100        |
| 2                           | 95                           | 93         | 89         | 90         |
| 3                           | 88                           | 93         | 87         | 81         |
| 4                           | 88                           | 94         | 88         | 84         |
| 5                           | 84                           | 58         | 80         | 79         |
| 6                           | 83                           | 84         | 77         | 80         |
| 7                           | 90                           | 83         | 88         | 81         |
| 8                           | 89                           | 85         | 85         | 84         |
| 9                           | 91                           | 84         | 85         | 86         |
| Real/final mass balance (%) |                              |            |            |            |
|                             | 92                           | 86         | 87         | 88         |

**Table S5.** Theoretical and real mass balance (%) of ammonium ions present in the synthetic feed and receiver solutions of the experiments conducted with NaCl solutions at 0.125 M, 0.25 M, and 0.5 M (Figure 4).

| Aliquot                     | Theoretical mass balance (%) |        |       |
|-----------------------------|------------------------------|--------|-------|
|                             | 0.125 M                      | 0.25 M | 0.5 M |
| 1                           | 100                          | 100    | 100   |
| 2                           | 97                           | 93     | 87    |
| 3                           | 97                           | 93     | 83    |
| 4                           | 97                           | 94     | 82    |
| 5                           | 94                           | 58     | 75    |
| 6                           | 96                           | 84     | 78    |
| 7                           | 87                           | 83     | 86    |
| 8                           | 84                           | 85     | 78    |
| 9                           | 84                           | 84     | 90    |
| Real/final mass balance (%) |                              |        |       |
|                             | 84                           | 86     | 93    |

**Table S6.** Theoretical and real mass balance (%) of ammonium ions present in the synthetic feed and receiver solutions of the experiments conducted with NaCl solutions ([R]) at 0.25 M and 0.5 M, and feed:receiver volume ratio ( $V_F:V_R$ ) of 1:1 and 1:2 (Figure 5).

| Aliquot                     | Theoretical mass balance (%)       |                                    |                                   |                                   |
|-----------------------------|------------------------------------|------------------------------------|-----------------------------------|-----------------------------------|
|                             | [R] = 0.25 M and $V_F:V_R = 1:1$ . | [R] = 0.25 M and $V_F:V_R = 1:2$ . | [R] = 0.5 M and $V_F:V_R = 1:1$ . | [R] = 0.5 M and $V_F:V_R = 1:2$ . |
| 1                           | 100                                | 100                                | 100                               | 100                               |
| 2                           | 93                                 | 96                                 | 87                                | 93                                |
| 3                           | 93                                 | 87                                 | 83                                | 80                                |
| 4                           | 94                                 | 86                                 | 82                                | 82                                |
| 5                           | 58                                 | 81                                 | 75                                | 78                                |
| 6                           | 84                                 | 76                                 | 78                                | 77                                |
| 7                           | 83                                 | 83                                 | 86                                | 87                                |
| 8                           | 85                                 | 81                                 | 78                                | 87                                |
| 9                           | 84                                 | 84                                 | 90                                | 88                                |
| Real/final mass balance (%) |                                    |                                    |                                   |                                   |
|                             | 86                                 | 86                                 | 92                                | 90                                |

**Table S7.** Theoretical and real mass balance (%) of ammonium ions present in the synthetic feed and receiver solutions of the experiments conducted under electric potential application of 0 V, -0.1 V, -0.6 V, and -1.0 V (Figure 7).

| Aliquot                     | Theoretical mass balance (%) |        |        |        |
|-----------------------------|------------------------------|--------|--------|--------|
|                             | 0 V                          | -0.1 V | -0.6 V | -1.0 V |
| 1                           | 100                          | 100    | 100    | 100    |
| 2                           | 97                           | 101    | 99     | 87     |
| 3                           | 87                           | 94     | 96     | 83     |
| 4                           | 89                           | 93     | 98     | 88     |
| 5                           | 74                           | 83     | 88     | 75     |
| 6                           | 73                           | 82     | 88     | 76     |
| 7                           | 78                           | 83     | 88     | 76     |
| 8                           |                              | 84     |        | 76     |
| Real/final mass balance (%) |                              |        |        |        |
|                             | 73                           | 85     | 90     | 76     |

**Table S8.** Theoretical and real mass balance (%) of ammonium ions present in the feed and receiver solutions of the experiments conducted with a real feed solution using Ralex and Fumasep membranes at different conditions (Figure 8).

| Aliquot                     | Theoretical mass balance (%)                               |                                                             |
|-----------------------------|------------------------------------------------------------|-------------------------------------------------------------|
|                             | Ralex; NaCl 0.25 M; $V_F:V_R$ of 1:2; 220 mL/min; 30 hours | Fumasep; NaCl 0.5 M; $V_F:V_R$ of 1:2; 330 mL/min; 80 hours |
| 1                           | 100                                                        | 100                                                         |
| 2                           | 98                                                         | 95                                                          |
| 3                           | 100                                                        | 89                                                          |
| 4                           | 93                                                         | 88                                                          |
| 5                           | 94                                                         | 90                                                          |
| 6                           | 95                                                         | 78                                                          |
| 7                           | 89                                                         | 80                                                          |
| 8                           | 92                                                         | 84                                                          |
| 9                           | 91                                                         | 84                                                          |
|                             |                                                            | 83                                                          |
|                             |                                                            | 86                                                          |
|                             |                                                            | 84                                                          |
|                             |                                                            | 88                                                          |
| Real/final mass balance (%) |                                                            |                                                             |
|                             | 85                                                         | 91                                                          |

**Table S9.** Molar concentration (mmol/L) of trace/other cationic and anionic species present in the initial and final real feed and receiver solutions.

|                  | Molar concentration (mmol/L)                                  |              |                    |                  |                                                                |              |                    |                  |
|------------------|---------------------------------------------------------------|--------------|--------------------|------------------|----------------------------------------------------------------|--------------|--------------------|------------------|
|                  | Ralex; NaCl 0.25 M; $V_F:V_R$ of 1:2;<br>220 mL/min; 30 hours |              |                    |                  | Fumasep; NaCl 0.5 M; $V_F:V_R$ of 1:2;<br>330 mL/min; 80 hours |              |                    |                  |
|                  | Feed (initial)                                                | Feed (final) | Receiver (initial) | Receiver (final) | Feed (initial)                                                 | Feed (final) | Receiver (initial) | Receiver (final) |
| Cationic species |                                                               |              |                    |                  |                                                                |              |                    |                  |
| Aluminium        | 0.0063                                                        | 0.0040       |                    |                  | 0.0059                                                         |              |                    |                  |
| Boron            | 0.0143                                                        | 0.0155       |                    |                  | 0.0132                                                         | 0.0125       |                    |                  |
| Calcium          | 3.7034                                                        | 1.2774       | 0.0040             | 0.7060           | 3.4126                                                         | 0.5187       | 0.0056             | 1.9477           |
| Copper           | 0.0026                                                        | 0.0021       |                    |                  | 0.0063                                                         | 0.0022       |                    |                  |
| Iron             | 0.0080                                                        | 0.0070       |                    |                  | 0.0089                                                         | 0.0079       |                    | 0.0054           |
| Magnesium        | 1.5509                                                        | 0.9366       | 0.0012             | 0.5491           | 1.4399                                                         | 1.0400       | 0.0028             | 0.6006           |
| Potassium        | 13.276                                                        | 6.3512       | 0.2657             | 2.5493           | 11.504                                                         | 1.0391       | 0.4767             | 9.6042           |
| Sodium           | 28.985                                                        | 43.389       | 195.57             | 202.92           | 26.318                                                         | 63.373       | 444.39             | 481.68           |
| Silicon          | 0.1189                                                        | 0.1178       | 0.0026             | 0.0025           | 0.1216                                                         | 0.1199       | 0.0051             | 0.0061           |
| Strontium        | 0.0046                                                        | 0.0014       |                    |                  | 0.0047                                                         |              |                    | 0.0015           |
| Zinc             | 0.0326                                                        | 0.0195       | 0.0007             | 0.0054           | 0.0315                                                         | 0.0119       | 0.0010             | 0.0088           |
| Anionic species  |                                                               |              |                    |                  |                                                                |              |                    |                  |
| Bromide          | 0.0261                                                        | 0.0262       | 0.0069             | 0.0064           | 0.0272                                                         | 0.0273       | 0.0087             | 0.0085           |
| Chloride         | 43.206                                                        | 42.426       | 236.42             | 234.38           | 40.836                                                         | 42.368       | 472.37             | 469.20           |
| Fluoride         | 25.068                                                        | 22.702       |                    |                  | 21.702                                                         | 21.326       |                    |                  |
| Nitrate          | 0.0255                                                        | 0.0247       | 0.0199             | 0.0235           | 0.0251                                                         | 0.0259       | 0.0201             | 0.0224           |
| Nitrite          | 1.9828                                                        | 1.9507       |                    |                  | 2.1014                                                         | 2.3117       |                    |                  |
| Sulfate          | 0.4479                                                        | 0.4405       | 0.0063             | 0.0057           | 0.4470                                                         | 0.4603       | 0.0078             | 0.0063           |

#### Section S1. Membrane characterization by means of ATR-FTIR

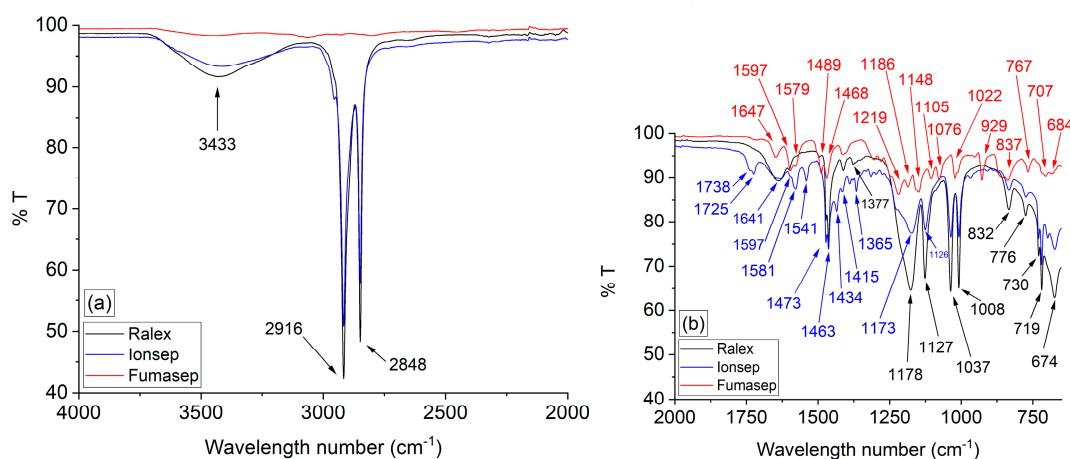

**Figure S1.** IR spectra of Fumasep, Ralex and Ionsep membranes.

The band at  $3433\text{ cm}^{-1}$  present at Ionsep and Ralex is related to  $\nu(\text{O-H})$  (stretching vibration) of the bounded water [47,48]. The peaks shown for Ralex and Ionsep at  $2916\text{ cm}^{-1}$  and  $2848\text{ cm}^{-1}$  correspond to the  $\nu_{\text{as}}\text{CH}_2$  and  $\nu_{\text{s}}\text{CH}_2$ , respectively [49-50]. The peaks at  $1738\text{ cm}^{-1}$  [51] and  $1725\text{ cm}^{-1}$  [52] correspond to the carbonyl stretching vibration  $\nu(\text{C=O})$  and are present only at Ionsep. The band at  $1641\text{ cm}^{-1}$  present at Ralex and Ionsep is due to the stretching of  $\text{CH}_2$  groups [53]. The bands at  $1597\text{ cm}^{-1}$  for Ionsep and Ralex and  $1598$

$\text{cm}^{-1}$  for Fumasep correspond to the aromatic C=C stretching in the polymer matrix [54]. The peaks at  $1581\text{ cm}^{-1}$  (Ionsep) and  $1579\text{ cm}^{-1}$  (Fumasep) correspond to vibration of aromatic ring skeleton [55] and is not present at Ralex. The band at  $1541\text{ cm}^{-1}$  is present only at Ionsep and is related to the C=C vibration [54]. The peaks at  $1473\text{ cm}^{-1}$  for Ralex and Ionsep and  $1468\text{ cm}^{-1}$  for Fumasep also correspond to the aromatic C=C [56]. The band at  $1463\text{ cm}^{-1}$  for Ralex and Ionsep is due to the asymmetrical  $\text{CH}_3$  bending vibration [50,57]. The peak at  $1434\text{ cm}^{-1}$  is present only at Ionsep and is related to the symmetric stretching vibration of  $-\text{CH}_2-$  [58,59]. The peaks at  $1415\text{ cm}^{-1}$  for Ionsep and Fumasep and  $1413\text{ cm}^{-1}$  for Ralex correspond to the aromatic C-H stretching vibrations [60]. The peak at  $1365\text{ cm}^{-1}$  for Ionsep and  $1377\text{ cm}^{-1}$  for Ralex are related to the  $\delta\text{C-H}$  [61,62]. A peak at  $1219\text{ cm}^{-1}$  was verified only for Fumasep and corresponds to S=O stretches belonging to sulfonic acid groups [63]. The bands at  $1173\text{ cm}^{-1}$ ,  $1126\text{ cm}^{-1}$ ,  $1037\text{ cm}^{-1}$ ,  $1008\text{ cm}^{-1}$  for Ionsep, and  $1178\text{ cm}^{-1}$ ,  $1127\text{ cm}^{-1}$ ,  $1037\text{ cm}^{-1}$  and  $1008\text{ cm}^{-1}$  for Ralex correspond to the  $-\text{SO}_3^-$  functional groups [64-67]. The band at  $929\text{ cm}^{-1}$  is present only at Fumasep and is related to C-O groups [68-70]. The peaks at  $837\text{ cm}^{-1}$  for Fumasep and  $832\text{ cm}^{-1}$  for Ralex and Ionsep are due to C-H bending, as well as the peaks at  $776\text{ cm}^{-1}$  (Ralex and Ionsep) and  $767\text{ cm}^{-1}$  (Fumasep) [71]. The bands at  $730\text{ cm}^{-1}$  and  $719\text{ cm}^{-1}$  were verified for Ralex and Ionsep and correspond to the  $\text{CH}_2$  deformation [67]. The peak at  $707\text{ cm}^{-1}$  was present only at Fumasep and corresponds to C-H stretching [72]. The band at  $674\text{ cm}^{-1}$  is related to the symmetric stretching vibration of S-O groups and is present only at Ralex and Ionsep membranes [73]. A small peak was verified for Fumasep at  $684\text{ cm}^{-1}$ , which may also be related to the aromatic C-H out-of-plane deformation [74].

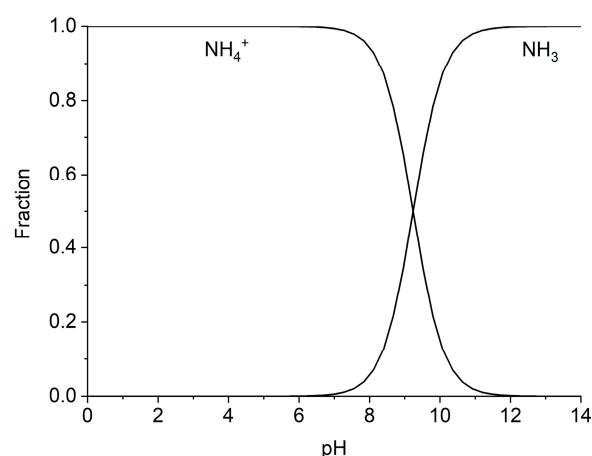

**Figure S2.** Speciation diagram for ammonia/ammonium ions.
